# Supplementary material
Source: PubMed Central journal article supplement (PMC7309572)
Supplement: jamaneurol-e201741-s001.pdf [file jamaneurol-e201741-s001.pdf]

## Supplementary Online Content

Karant S, Nelson PT, Katsumata Y, et al. Prevalence and clinical phenotype of quadruple misfolded proteins in older adults. *JAMA Neurol*. Published online June 22, 2020.  
doi:10.1001/jamaneurol.2020.1741

**eFigure 1.** Flow Diagram Included Cases

**eTable 1.** Proteinopathy Case Group Characteristics Who Began Follow-Up While Normal (n=228)

**eFigure 2.** Bar Graph Showing Distribution of Proteinopathy Case Groups Among Participants (n=375)

**eFigure 3.** Bar Graph Showing Distribution of Proteinopathy Case Groups for Those Participants Who Began Follow-Up While Normal (n=228), and With Last Clinical Diagnosis of Dementia and MCI

**eTable 2.** Frequency of Missing Data in All Participants (n=375)

**eTable 3.** Frequency of Missing Data in All Participants Who Began Follow-Up While Normal (n=228)

This supplementary material has been provided by the authors to give readers additional information about their work.

**eFigure 1.** Flow Diagram Included Cases

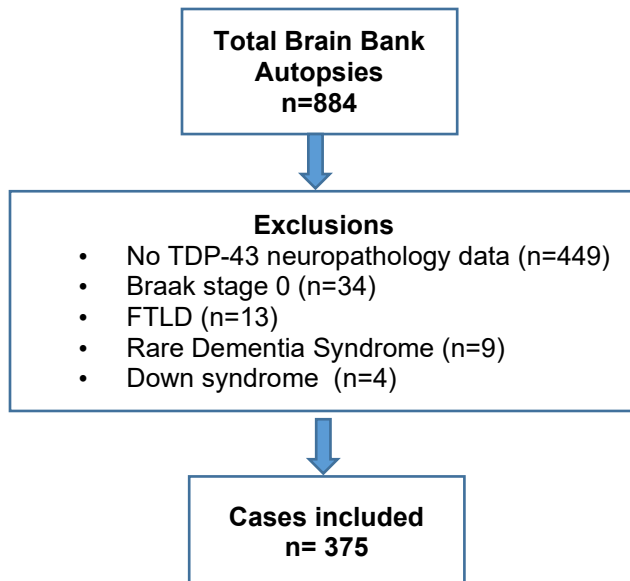

Abbreviation: TDP-43, transactive response DNA-binding protein of 43; FTLD, frontotemporal lobar degeneration

**eTable 1. Proteinopathy Case Group Characteristics Who Began Follow-Up While Normal (n=228)**

|                                       | Overall<br>n=228 | Tau<br>n=20 | Tau <sub>Braak II-IV</sub><br>+ Aβ<br>n= 75 | Tau <sub>Braak V-VI</sub><br>+ Aβ<br>n= 30 | Tau +TDP-43<br>n= 17 | Tau + Aβ<br>+ α-Syn<br>n= 32 | Tau +Aβ +<br>TDP-43<br>n=35 | QMP<br>n= 19 |
|---------------------------------------|------------------|-------------|---------------------------------------------|--------------------------------------------|----------------------|------------------------------|-----------------------------|--------------|
| Age at death, y                       | 89.1 (6.4)       | 85.6 (6.1)  | 88.8 (6.5)                                  | 89.0 (6.9)                                 | 90.9 (7.0)           | 87.5 (6.5)                   | 91.7 (4.0)                  | 90.2 (6.2)   |
| Age on onset (MCI)                    | 85.1 (6.7)       | 82.6 (3.7)  | 87.1 (5.6)                                  | 84.2 (7.2)                                 | 89.7 (4.7)           | 79.6 (7.9)                   | 86.8 (3.8)                  | 82.1 (9.4)   |
| Age of onset<br>(Dementia)            | 86.1 (6.9)       | 82.0 (NA)   | 88.7 (5.4)                                  | 85.5 (8.6)                                 | 88.5 (6.2)           | 81.7 (7.0)                   | 88.3 (4.3)                  | 83.6 (8.4)   |
| Female sex                            | 149 (65.4)       | 13 (65.0)   | 44 (58.7)                                   | 20 (66.7)                                  | 15 (88.2)            | 24 (75.0)                    | 21 (60.0)                   | 12 (63.2)    |
| White race                            | 224 (98.3)       | 20 (100.0)  | 73 (97.3)                                   | 30 (100.0)                                 | 16 (94.2)            | 31 (96.9)                    | 35 (100.0)                  | 19 (100.0)   |
| Education, y                          | 16.1 (2.6)       | 15.2 (2.7)  | 15.9 (2.5)                                  | 16.0 (3.0)                                 | 16.7 (2.4)           | 15.9 (2.7)                   | 16.5 (2.6)                  | 16.4 (2.3)   |
| APOE ε4 +                             | 73 (32.0)        | 1 (5.0)     | 21 (28.0)                                   | 17 (56.7)                                  | 3 (17.7)             | 13 (40.6)                    | 12 (34.3)                   | 6 (31.6)     |
| Final MMSE Score                      | 23.7 (7.8)       | 27.9 (2.2)  | 26.7 (4.5)                                  | 21.2 (8.6)                                 | 22.2 (9.1)           | 23.7 (8.3)                   | 19.6 (9.7)                  | 18.9 (9.0)   |
| Last Clinical Dx                      |                  |             |                                             |                                            |                      |                              |                             |              |
| Normal                                | 104 (45.6)       | 16 (80.0)   | 48 (64.0)                                   | 7 (23.3)                                   | 6 (35.3)             | 14 (43.8)                    | 6 (17.1)                    | 5 (26.3)     |
| Impaired/Other                        | 6 (2.6)          | 1 (5.0)     | 3 (4.0)                                     | 1 (3.3)                                    | 0                    | 1 (3.1)                      | 0                           | 0            |
| MCI                                   | 35 (15.4)        | 2 (10.0)    | 12 (16.0)                                   | 7 (23.3)                                   | 3 (17.7)             | 6 (18.8)                     | 5 (14.3)                    | 0            |
| Demented                              | 83 (36.4)        | 1 (5.0)     | 12 (16.0)                                   | 15 (50.0)                                  | 6 (47.1)             | 11 (34.4)                    | 24 (68.6)                   | 14 (73.7)    |
| Braak NFT stage                       |                  |             |                                             |                                            |                      |                              |                             |              |
| I                                     | 17 (7.5)         | 7 (35.0)    | 0                                           | 0                                          | 4 (23.5)             | 4 (12.5)                     | 1 (2.9)                     | 1 (5.3)      |
| II                                    | 65 (28.5)        | 9 (45.0)    | 37 (49.3)                                   | 0                                          | 8 (47.1)             | 6 (18.8)                     | 2 (5.7)                     | 3 (15.8)     |
| III                                   | 40 (17.5)        | 2 (10.0)    | 23 (30.7)                                   | 0                                          | 4 (23.5)             | 4 (12.5)                     | 3 (8.6)                     | 4 (21.1)     |
| IV                                    | 30 (13.2)        | 2 (10.0)    | 15 (20.0)                                   | 0                                          | 1 (5.9)              | 4 (12.5)                     | 6 (17.1)                    | 2 (10.5)     |
| V                                     | 54 (23.7)        | 0           | 0                                           | 20 (66.7)                                  | 0                    | 10 (31.2)                    | 20 (57.1)                   | 4 (21.1)     |
| VI                                    | 22 (9.6)         | 0           | 0                                           | 10 (33.3)                                  | 0                    | 4 (12.5)                     | 3 (8.6)                     | 5 (26.3)     |
| Atherosclerosis<br>(vessels occluded) |                  |             |                                             |                                            |                      |                              |                             |              |
| <50%                                  | 86 (37.7)        | 12 (60.0)   | 28 (37.3)                                   | 12 (40.0)                                  | 8 (47.1)             | 12 (37.5)                    | 10 (28.6)                   | 4 (21.0)     |
| ≥50%                                  | 142 (62.3)       | 8 (40.0)    | 47 (62.7)                                   | 18 (60.0)                                  | 9 (52.9)             | 20 (62.5)                    | 25 (71.4)                   | 15 (79.0)    |
| Arteriolosclerosis                    |                  |             |                                             |                                            |                      |                              |                             |              |
| None/Mild                             | 145 (63.6)       | 16 (80.0)   | 46 (61.3)                                   | 20 (66.7)                                  | 10 (58.8)            | 21 (65.6)                    | 22 (62.9)                   | 10 (52.6)    |
| Moderate/Severe                       | 60 (26.3)        | 2 (10.0)    | 21 (28.0)                                   | 6 (20.0)                                   | 5 (29.4)             | 9 (28.1)                     | 9 (25.7)                    | 8 (42.1)     |
| Infarcts                              |                  |             |                                             |                                            |                      |                              |                             |              |
| Stage 0                               | 114 (50.0)       | 12 (63.2)   | 39 (51.3)                                   | 11 (36.7)                                  | 8 (47.1)             | 19 (59.4)                    | 15 (42.9)                   | 10 (52.6)    |
| Stage 1                               | 78 (34.2)        | 2 (10.5)    | 21 (27.6)                                   | 11 (36.7)                                  | 8 (47.1)             | 11(34.4)                     | 18 (51.4)                   | 7 (36.8)     |
| Stage 2                               | 36 (15.8)        | 5 (26.3)    | 16 (21.1)                                   | 8 (26.7)                                   | 1 (5.9)              | 2 (6.3)                      | 2 (5.7)                     | 2 (10.5)     |

|                       |           |           |           |           |           |           |           |           |
|-----------------------|-----------|-----------|-----------|-----------|-----------|-----------|-----------|-----------|
| HS +                  | 44 (19.3) | 0         | 1 (1.3)   | 1 (3.3)   | 8 (47.1)  | 2 (6.3)   | 18 (51.4) | 14 (73.7) |
| AGD +                 | 35 (15.3) | 4 (20.0)  | 14 (18.7) | 3 (10.0)  | 2 (11.8)  | 1 (3.1)   | 8 (22.9)  | 3 (15.8)  |
| Mean time in state, y |           |           |           |           |           |           |           |           |
| MCI                   | 2.9 (2.0) | 3.1 (3.1) | 3.0 (2.4) | 3.0 (2.0) | 3.3 (1.7) | 2.7 (1.9) | 3.1 (2.1) | 1.8 (0.6) |
| Dementia              | 4.9 (3.1) | 7.1 (NA)  | 3.9 (2.4) | 4.6 (3.5) | 4.9 (1.6) | 6.2 (3.9) | 4.8 (2.7) | 5.7 (3.8) |

Data are mean (SD) or n (%). y, years; MMSE, Mini-Mental State Examination; QMP, quadruple misfolded proteins; A $\beta$ , Amyloid  $\beta$ ;  $\alpha$ -Syn,  $\alpha$ -Synuclein; TDP-43, transactive response DNA-binding protein of 43; NFT, neurofibrillary tangle; APOE  $\epsilon$ 4 - Apolipoprotein  $\epsilon$ 4 allele; Dx, Diagnosis; MCI, Mild cognitive impairment; NA, SD could not be calculated, only one participant in the cell; Stage 0, No infarcts; Stage 1, microinfarcts or lacunar/large infarcts; Stage 2, both microinfarcts and lacunar/larger infarcts; HS-Hippocampal Sclerosis; AGD- Argyrophilic grain disease; Missing data information can be found in eTables 2 and 3.

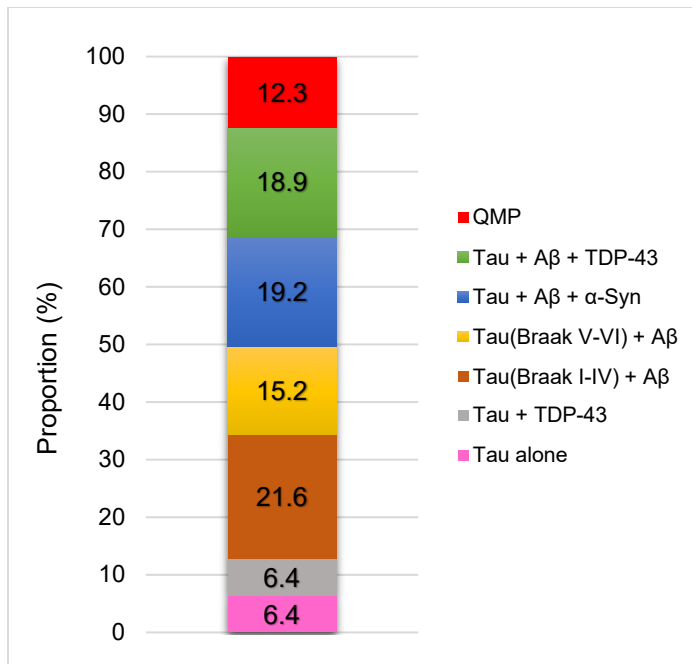

**eFigure 2.** Bar Graph Showing Distribution of Proteinopathy Case Groups Among Participants (n=375)

Abbreviation: QMP, quadruple misfolded proteins; A $\beta$ , Amyloid  $\beta$ ;  $\alpha$ -Syn,  $\alpha$ -Synuclein; TDP-43, transactive response DNA-binding protein of 43.

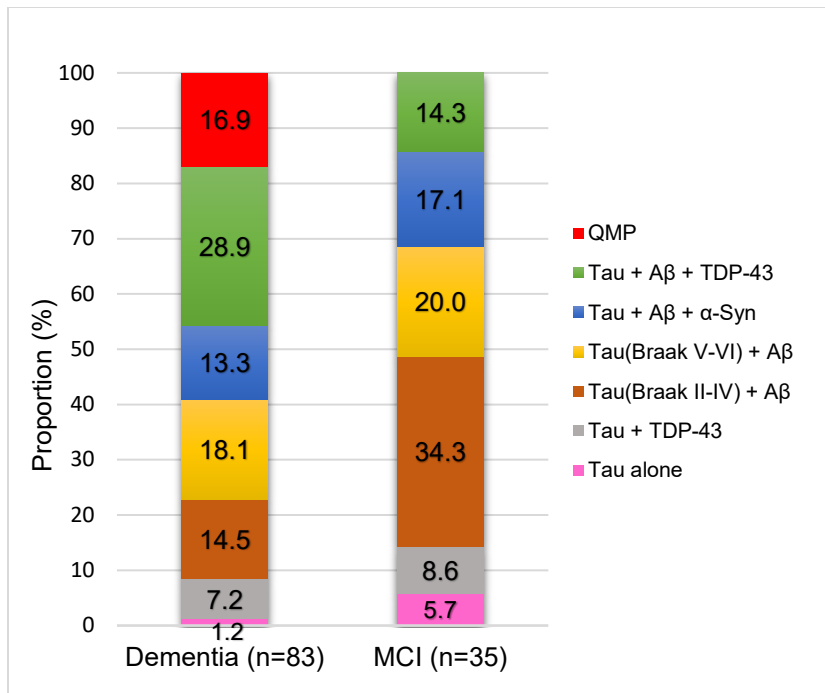

**eFigure 3.** Bar Graph Showing Distribution of Proteinopathy Case Groups for Those Participants Who Began Follow-Up While Normal (n=228), and With Last Clinical Diagnosis of Dementia and MCI

Abbreviation: MCI, Mild cognitive impairment; QMP, quadruple misfolded proteins; Aβ, Amyloid β; α-Syn, α-Synuclein; TDP-43, transactive response DNA binding protein of 43.

**eTable 2.** Frequency of Missing Data in All Participants (n=375)

|                            | <b>Overall<br/>n=375</b> | <b>Tau<br/>n=24</b> | <b>Tau<sup>Braak I-IV</sup> + A<math>\beta</math><br/>n=81</b> | <b>Tau<sup>Braak V-VI</sup> + A<math>\beta</math><br/>n=57</b> | <b>Tau<br/>+ TDP-43<br/>n=24</b> | <b>Tau + A<math>\beta</math><br/>+ <math>\alpha</math>-Syn<br/>n=72</b> | <b>Tau + A<math>\beta</math><br/>+ TDP-43<br/>n=71</b> | <b>QMP<br/>n=46</b> |
|----------------------------|--------------------------|---------------------|----------------------------------------------------------------|----------------------------------------------------------------|----------------------------------|-------------------------------------------------------------------------|--------------------------------------------------------|---------------------|
| Education                  | 7                        | 0                   | 1                                                              | 1                                                              | 0                                | 1                                                                       | 1                                                      | 3                   |
| <i>APOE</i> $\epsilon$ 4 + | 19                       | 0                   | 2                                                              | 5                                                              | 1                                | 5                                                                       | 5                                                      | 1                   |
| MMSE                       | 48                       | 1                   | 4                                                              | 10                                                             | 1                                | 11                                                                      | 10                                                     | 11                  |
| Last clinical Dx           | 2                        | 0                   | 1                                                              | 0                                                              | 0                                | 0                                                                       | 1                                                      | 0                   |
| Atherosclerosis            | 4                        | 0                   | 0                                                              | 0                                                              | 0                                | 1                                                                       | 1                                                      | 2                   |
| Arteriolosclerosis         | 45                       | 2                   | 8                                                              | 9                                                              | 3                                | 2                                                                       | 17                                                     | 4                   |
| HS                         | 4                        | 1                   | 0                                                              | 0                                                              | 0                                | 1                                                                       | 2                                                      | 0                   |
| AGD                        | 9                        | 0                   | 3                                                              | 2                                                              | 1                                | 0                                                                       | 2                                                      | 1                   |

Abbreviation: MMSE, Mini-Mental State Examination; QMP, quadruple misfolded proteins; A $\beta$ , Amyloid  $\beta$ ;  $\alpha$ -Syn,  $\alpha$ -Synuclein; TDP-43, transactive response DNA-binding protein of 43; *APOE*  $\epsilon$ 4 - Apolipoprotein  $\epsilon$ 4 allele; HS-Hippocampal Sclerosis; AGD- Argyrophilic grain disease; Variables not listed here are fully observed.

**eTable 3.** Frequency of Missing Data in All Participants Who Began Follow-Up While Normal (n=228)

|                    | Overall<br>n=228 | Tau<br>n=20 | Tau <sub>Braak I-IV</sub> + A $\beta$<br>n= 75 | Tau <sub>Braak V-VI</sub> + A $\beta$<br>n= 30 | Tau +TDP-43<br>n= 17 | Tau + A $\beta$<br>+ $\alpha$ -Syn<br>n= 32 | Tau +A $\beta$ +<br>TDP-43<br>n=35 | QMP<br>n= 19 |
|--------------------|------------------|-------------|------------------------------------------------|------------------------------------------------|----------------------|---------------------------------------------|------------------------------------|--------------|
| Education          | 3                | 0           | 1                                              | 0                                              | 0                    | 1                                           | 0                                  | 1            |
| APOE               | 2                | 0           | 2                                              | 0                                              | 0                    | 0                                           | 0                                  | 0            |
| MMSE               | 18               | 0           | 3                                              | 4                                              | 1                    | 6                                           | 2                                  | 2            |
| Arteriolosclerosis | 23               | 2           | 8                                              | 4                                              | 2                    | 2                                           | 4                                  | 1            |
| HS                 | 2                | 1           | 0                                              | 0                                              | 0                    | 1                                           | 0                                  | 0            |
| AGD                | 6                | 0           | 3                                              | 2                                              | 0                    | 0                                           | 1                                  | 0            |

Abbreviation: MMSE, Mini-Mental State Examination; QMP, quadruple misfolded proteins; A $\beta$ , Amyloid Beta;  $\alpha$ -Syn,  $\alpha$ -Synuclein; TDP-43, transactive response DNA-binding protein of 43 kDa; APOE  $\epsilon$ 4 - Apolipoprotein  $\epsilon$ 4 allele; Dx, Diagnosis; HS-Hippocampal Sclerosis; AGD- Argyrophilic grain disease; Variables not listed here are fully observed.
